# Supplementary material for: Antifungal Activity of an Abundant Thaumatin-Like Protein from Banana against Penicillium expansum, and Its Possible Mechanisms of Action
Source: Molecules. 2018 Jun 14;23(6):1442. doi: 10.3390/molecules23061442 (PMC6099679; doi:10.3390/molecules23061442)
Supplement: Supplementary file 1 [file molecules-23-01442-s001.pdf]

### **Supplementary materials**

**Supplementary Figure. S1.** The Mascot search results of BanTLP purified from banana.

**Supplementary Table S1.** The minimal inhibitory concentrations (MIC) ( $\mu\text{M}$ ) of BanTLP against four common postharvest fungi.

**Supplementary Figure. S2.** The effect of BanTLP at 60  $\mu\text{M}$  on the membrane of *P. expansum* conidia by analyzing PI influx.

Mascot Score Histogram

Protein score is  $-10 \times \log(P)$ , where P is the probability that the observed match is a random event.  
Protein scores greater than 77 are significant ( $p < 0.05$ ).  
Protein scores are derived from ions scores as a non-probabilistic basis for ranking protein hits.

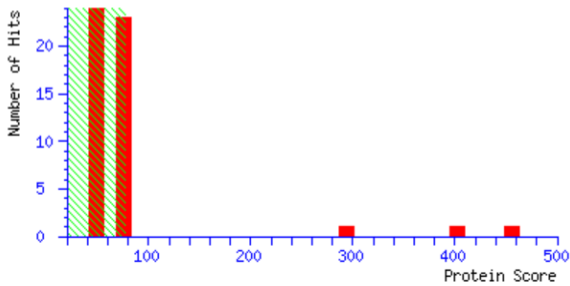

|                                                                                                                                                                                                                                                                                                                                          |             |            |                 |             |               |                                |
|------------------------------------------------------------------------------------------------------------------------------------------------------------------------------------------------------------------------------------------------------------------------------------------------------------------------------------------|-------------|------------|-----------------|-------------|---------------|--------------------------------|
| <a href="#">gi 88191901</a>                                                                                                                                                                                                                                                                                                              | Mass: 22130 | Score: 414 | Expect: 1.2e-35 | Matches: 12 |               |                                |
| Chain A, Resolution Of The Structure Of The Allergenic And Antifungal Banana Fruit Thaumatin-like Protein At 1.7a                                                                                                                                                                                                                        |             |            |                 |             |               |                                |
| Observed                                                                                                                                                                                                                                                                                                                                 | Mr(expt)    | Mr(calc)   | ppm             | Start       | End Miss Ions | Peptide                        |
| 949.5358                                                                                                                                                                                                                                                                                                                                 | 948.5285    | 948.5029   | 27.0            | 1 -         | 8 0 ---       | - .ATFEIVNR.C                  |
| 949.5358                                                                                                                                                                                                                                                                                                                                 | 948.5285    | 948.5029   | 27.0            | 1 -         | 8 0 58        | - .ATFEIVNR.C                  |
| 1043.4521                                                                                                                                                                                                                                                                                                                                | 1042.4448   | 1042.4138  | 29.7            | 48 -        | 57 0 ---      | R.TGCSFDGSGR.G                 |
| 1043.4521                                                                                                                                                                                                                                                                                                                                | 1042.4448   | 1042.4138  | 29.7            | 48 -        | 57 0 32       | R.TGCSFDGSGR.G                 |
| 1370.6466                                                                                                                                                                                                                                                                                                                                | 1369.6393   | 1369.6085  | 22.5            | 169 -       | 179 1 ---     | K.RNCPDAYSYPK.D                |
| 1421.6731                                                                                                                                                                                                                                                                                                                                | 1420.6658   | 1420.6228  | 30.3            | 135 -       | 147 0 ---     | K.APGGCNNPCTVFK.T              |
| 1551.7830                                                                                                                                                                                                                                                                                                                                | 1550.7757   | 1550.7300  | 29.5            | 9 -         | 23 0 ---      | R.CSYTVWAAAVPGGGR.Q            |
| 1551.7830                                                                                                                                                                                                                                                                                                                                | 1550.7757   | 1550.7300  | 29.5            | 9 -         | 23 0 59       | R.CSYTVWAAAVPGGGR.Q            |
| 1833.8250                                                                                                                                                                                                                                                                                                                                | 1832.8177   | 1832.7636  | 29.5            | 180 -       | 195 0 ---     | K.DDQTTTFTCPGGTNYR.V           |
| 2102.0903                                                                                                                                                                                                                                                                                                                                | 2101.0830   | 2101.0301  | 25.2            | 24 -        | 43 0 ---      | R.QLNQGGQSWTINVNAGTTGGR.I      |
| 2102.0903                                                                                                                                                                                                                                                                                                                                | 2101.0830   | 2101.0301  | 25.2            | 24 -        | 43 0 176      | R.QLNQGGQSWTINVNAGTTGGR.I      |
| 3029.3157                                                                                                                                                                                                                                                                                                                                | 3028.3084   | 3028.2604  | 15.9            | 170 -       | 195 1 ---     | R.NCPDAYSYPKDDQTTTFTCPGGTNYR.V |
| No match to: 804.3040, 986.4307, 1006.5640, 1006.5640, 1057.4685, 1435.6927, 1445.7650, 1458.6826, 1461.7598, 1494.7568, 1534.7555, 1534.7555, 1547.7377, 1550.7223, 1565.8019, 1565.8019, 1583.7809, 1819.8057, 1819.8057, 2056.0181, 2085.0632, 2085.0632, 2117.2581, 2135.0427, 2157.8369, 2171.8599, 2186.8708, 3015.2649, 3015.2649 |             |            |                 |             |               |                                |

Supplementary Figure S1. The Mascot search results of BanTLP purified from banana.

Ions score is  $-10 \times \log(P)$ , where P is the probability that the observed match is a random event. Individual ions scores  $> 55$  indicate identity or extensive homology ( $p < 0.05$ ). Protein scores are derived from ions scores as a non-probabilistic basis for ranking protein hits.

**Supplementary Table S1.** The minimal inhibitory concentrations (MIC) ( $\mu\text{M}$ ) of BanTLP against four common postharvest fungi.

| BanTLP ( $\mu\text{M}$ ) | <i>Penicillium expansum</i> | <i>Rhizopus stolonifer</i> | <i>Botrytis cinerea</i> | <i>Alternaria alternata</i> |
|--------------------------|-----------------------------|----------------------------|-------------------------|-----------------------------|
| 120                      | -                           | -                          | -                       | -                           |
| 60                       | -                           | -                          | -                       | -                           |
| 30                       | -                           | +                          | +                       | -                           |
| 15                       | +                           | +                          | +                       | +                           |
| 7.5                      | +                           | +                          | +                       | +                           |
| 3.7                      | +                           | +                          | +                       | +                           |
| 1.8                      | +                           | +                          | +                       | +                           |
| 0.9                      | +                           | +                          | +                       | +                           |
| 0.45                     | +                           | +                          | +                       | +                           |
| 0.22                     | +                           | +                          | +                       | +                           |
| 0.11                     | +                           | +                          | +                       | +                           |
| 0.05                     | +                           | +                          | +                       | +                           |
| 0.02                     | +                           | +                          | +                       | +                           |

“-” indicates no fungi detected. “+” indicates fungi detected.

Note: The values of MIC for BanTLP against the common postharvest fungal strains including *P. expansum*, *R. stolonifera*, *B. cinerea*, and *A. alternata* were determined as described by Dananjaya et al. (2017). Briefly, an aliquot of 50  $\mu\text{L}$  fungal spore suspension ( $1 \times 10^6$  spores  $\text{mL}^{-1}$ ) was added into 96-well microplates containing 100  $\mu\text{L}$ /well of potato dextrose broth (PDB). Then 100  $\mu\text{L}$  BanTLP was tested in serial dilutions in a concentration range from 0.02 to 120  $\mu\text{M}$ . PDB medium without BanTLP and with sodium hypochlorite were used as negative and positive controls, respectively. Each treatment was carried out in triplicates. All the plates were incubated at 28 °C for 48 h and the lowest concentration of BanTLP that did not permit any visible growth after 48 h was considered as the MIC.

#### Reference cited

Dananjaya, S.H.S.; Udayangani, R.M. C.; Sang, Y.S.; Edussuriya, M.; Nikapitiya, C.; Lee, J.; Zoysa, M.D. In vitro and in vivo antifungal efficacy of plant based lawsone against *Fusarium oxysporum* species complex. *Microbiol. Res.* **2017**, *201*, 21.

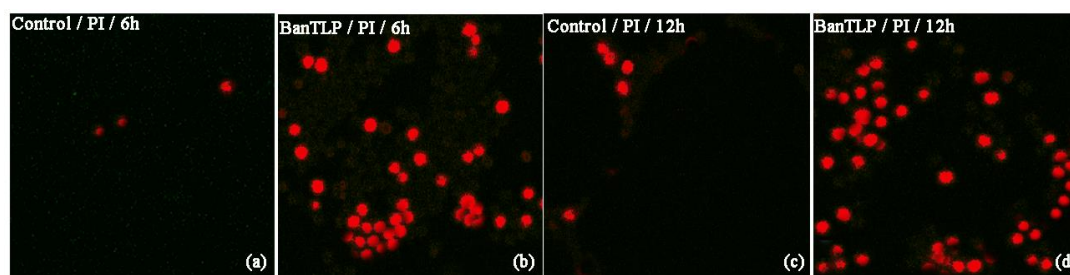

**Supplementary Figure S2.** Effect of BanTLP at 60  $\mu$ M on the membrane of *P. expansum* conidia by analyzing PI influx. PI fluorescent probe was visualized with the aid of fluorescence microscopy in *P. expansum* conidia treated with distilled water for 6 h (a) and 12 h (c) or treated with BanTLP for 6 h (b) and 12 h (d). There were three replicates per treatment, and three fields of view from each microscope slide were observed.
